# Supplementary material for: p38b and JAK-STAT signaling protect against Invertebrate iridescent virus 6 infection in Drosophila
Source: PubMed Central journal article supplement (PMC5963806; doi:10.1371/journal.ppat.1007020), 2018-05-10
Supplement: ppat.1007020.s001.pdf [file ppat.1007020.s001.pdf]

**S1 Table: Primer Sequences Used for RT-PCR, QPCR, or dsRNA synthesis**

| <b>Primer</b>      | <b>Sequence</b>                                        |
|--------------------|--------------------------------------------------------|
| TotA F             | CCCAGTTTGACCCCTGAG                                     |
| TotA R             | GCCCTTCACACCTGGAGA                                     |
| TotM F             | ACCGGAACATCGACAGCCTAGCCA                               |
| TotM R             | CCAGAATCCGCCTTGTGC                                     |
| TotB F             | CTGATTGGA ACTCTATGCTCGGC                               |
| TotB R             | TTGTCGTCCCAGGAGGTTTCG                                  |
| TotC F             | TACTATGCCTTGCCCTGCTCC                                  |
| TotC R             | TGTT CAGGGGACAACGTGGG                                  |
| TotE F             | GGCTGCCTTTTGGGTT CAGG                                  |
| TotE R             | TATCGACGGAGGGATTGCCG                                   |
| TotF F             | AAGGCACGTCAAATGCTCGC                                   |
| TotF R             | TGTTGGTTGTTGTGTGCCCG                                   |
| TotX F             | TCCATCATCCCATCAAGCAAGC                                 |
| TotX R             | GCACCATCAACCAAACTGCC                                   |
| TotZ F             | CTCACAGGAAACGGAAGTGC                                   |
| TotZ R             | GCGGCCTTCTTTATTGCTCC                                   |
| upd1 F             | CGATCATCCGACCCGTAATCC                                  |
| upd1 R             | ACTGTTCCCTCCCTGACTAGATGG                               |
| upd2 F             | TCAACTTTCACACGCCAGCC                                   |
| upd2 R             | CACCAGTTCCGTGAATCGCC                                   |
| upd3 F             | ACAAAACGGCCAGAACCAGG                                   |
| upd3 R             | GAAGGTCAGCCGGAAGTTGG                                   |
| IIV-6 MCP F        | GTATGGCAAAGCAGCAGTAGGAAGAGCAACTCCAGAATC<br>GC          |
| IIV-6 MCP R        | TCTCGCGATCGTAACTATTCTCTAATTTTTTTACTTGCATGA<br>AAAATAAG |
| hop T7-DRSC23334 F | TAATACGACTCACTATAGGGGACCACTCACCGACAATCCT               |
| hop T7-DRSC23334 R | TAATACGACTCACTATAGGGCAGTCCCGTTGATTTGTCCT               |
| hop T7 DRSC26551 F | TAATACGACTCACTATAGGGGAGTCCCGTCAAGGATGTGT               |

**S1 Table: Primer Sequences Used for RT-PCR, QPCR, or dsRNA synthesis**

|                          |                                                |
|--------------------------|------------------------------------------------|
| hop T7 DRSC26551 R       | TAATACGACTCACTATAGGGATAGCCGGGATCGCTAATTT       |
| Domeless, T7 DRSC19583 F | TAATACGACTCACTATAGGGCGTCTGCGCAGTGATCC          |
| Domeless, T7 DRSC19583 R | TAATACGACTCACTATAGGGTGGGCTCCGATGGATAGA         |
| Domeless, T7 DRSC36980 F | TAATACGACTCACTATAGGGCGGGCAGGAACCTATCCTAT       |
| Domeless, T7 DRSC36980 R | TAATACGACTCACTATAGGGGATATCGGACATCTTGCGGT       |
| STAT92E, T7 DRSC16870 F  | TAATACGACTCACTATAGGGCTTGCCCAAACACTACAGTTA<br>C |
| STAT92E, T7 DRSC16870 R  | TAATACGACTCACTATAGGGCGACTGTGGGTGGATTGTT        |
| STAT92E, T7 DRSC37655 F  | TAATACGACTCACTATAGGGGTGGCCCTAAAGTTCAACGA       |
| STAT92E, T7 DRSC37655 R  | TAATACGACTCACTATAGGGTGTGACCTCGTACAGCTC         |
| domeless F               | CGGCTACAACACTACACGCTCC                         |
| domeless R               | CCCAGTAGAAGCGCATAGCC                           |
| STAT92E F                | AGTTCTACTCAAAGCGTCAAGATCC                      |
| STAT92E R                | CAGTTGCATGCTTTCCTGAGC                          |
| hop F                    | AATTCGCTGAGTGTGGAGCG                           |
| hop R                    | GAGCGTGGACAGAGTGTTGG                           |
| p38a F                   | CAGCCCGTGGGATCGGG                              |
| p38a R                   | AGCTCCCGGTACGTCCTC                             |
| p38b F                   | CGGCCAGGTCTGCAAGGC                             |
| p38b R                   | CCATGTACACTTGCTGGAAGT                          |
| Rp49 F                   | CCCAAGGGTATCGACAACAG                           |
| Rp49 R                   | GACAATCTCCTTGCGCTTCT                           |
