# Supplementary material for: p38b and JAK-STAT signaling protect against Invertebrate iridescent virus 6 infection in Drosophila
Source: PubMed Central journal article supplement (PMC5963806; doi:10.1371/journal.ppat.1007020), 2018-05-10
Supplement: ppat.1007020.s002.pdf [file ppat.1007020.s002.pdf]

**S2 Table: Hazard Ratios of IIV-6-infected and PBS-injected flies.**

| Genotype A                                                     | Genotype B                                      | Treatment | Hazard Ratio (logrank) A:B | p value Log Rank (Mantel Cox) | Figure/Panel                     |
|----------------------------------------------------------------|-------------------------------------------------|-----------|----------------------------|-------------------------------|----------------------------------|
| <i>TubulinGAL4</i> ><br><i>Stat92E<sup>RNAi</sup></i><br>VDRC  | <i>TubulinGAL4</i> ><br><i>w<sup>1118</sup></i> | PBS       | 1.693                      | 0.2752                        | Figure 3B                        |
| <i>TubulinGAL4</i> ><br><i>Stat92E<sup>RNAi</sup></i><br>VDRC  | <i>TubulinGAL4</i> ><br><i>w<sup>1118</sup></i> | IIV-6     | 2.614                      | <0.0001                       | Figure 3B                        |
| <i>c564GAL4</i> ><br><i>Stat92E<sup>RNAi</sup></i><br>(TRiP-1) | <i>w<sup>1118</sup></i>                         | PBS       | 1.389                      | 0.2456                        | Figure 3C                        |
| <i>c564GAL4</i> ><br><i>Stat92E<sup>RNAi</sup></i><br>(TRiP-1) | <i>w<sup>1118</sup></i>                         | IIV-6     | 2.708                      | <0.0001                       | Figure 3C                        |
| <i>c564GAL4</i> ><br><i>Stat92E<sup>RNAi</sup></i><br>(TRiP-2) | <i>w<sup>1118</sup></i>                         | PBS       | 1.228                      | 0.5451                        | Supplemental 1E                  |
| <i>c564GAL4</i> ><br><i>Stat92E<sup>RNAi</sup></i><br>(TRiP-2) | <i>w<sup>1118</sup></i>                         | IIV-6     | 2.097                      | 0.0066                        | Supplemental 1E                  |
| <i>TubulinGAL4</i> ><br><i>Stat92E<sup>RNAi</sup></i><br>VDRC  | <i>TubulinGAL4</i> ><br><i>w<sup>1118</sup></i> | PBS       | 0.4437                     | 0.0024                        | Supplemental<br>Figure 2, Top    |
| <i>TubulinGAL4</i> ><br><i>Stat92E<sup>RNAi</sup></i><br>VDRC  | <i>TubulinGAL4</i> ><br><i>w<sup>1118</sup></i> | IIV-6     | 2.254                      | <0.0001                       | Supplemental<br>Figure 2, Top    |
| <i>TubulinGAL4</i> ><br><i>Stat92E<sup>RNAi</sup></i><br>VDRC  | <i>TubulinGAL4</i> ><br><i>w<sup>1118</sup></i> | PBS       | 1.113                      | 0.8238                        | Supplemental<br>Figure 2, Bottom |
| <i>TubulinGAL4</i> ><br><i>Stat92E<sup>RNAi</sup></i><br>VDRC  | <i>TubulinGAL4</i> ><br><i>w<sup>1118</sup></i> | IIV-6     | 4.123                      | <0.0001                       | Supplemental<br>Figure 2, Bottom |
| <i>p38b<sup>ex9</sup></i>                                      | <i>w<sup>1118</sup></i>                         | PBS       | 1.468                      | 0.5402                        | Figure 5, B                      |
| <i>p38b<sup>ex9</sup></i>                                      | <i>w<sup>1118</sup></i>                         | IIV-6     | 5.711                      | <0.0001                       | Figure 5, B                      |
| <i>p38a<sup>MPK1</sup></i>                                     | <i>w<sup>1118</sup></i>                         | PBS       | 1.174                      | 0.7441                        | Figure 5, C                      |
| <i>p38a<sup>MPK1</sup></i>                                     | <i>w<sup>1118</sup></i>                         | IIV-6     | 0.6986                     | 0.3922                        | Figure 5, C                      |
| <i>TubulinGAL4</i> ><br><i>p38b<sup>RNAi</sup></i>             | <i>TubulinGAL4</i> ><br><i>w<sup>1118</sup></i> | PBS       | 1.189                      | 0.7452                        | Figure 5D                        |
| <i>TubulinGAL4</i> ><br><i>p38b<sup>RNAi</sup></i>             | <i>TubulinGAL4</i> ><br><i>w<sup>1118</sup></i> | IIV-6     | 4.643                      | <0.0001                       | Figure 5D                        |

**S2 Table: Hazard Ratios of IIV-6-infected and PBS-injected flies.**

|                                             |                                          |       |        |         |                               |
|---------------------------------------------|------------------------------------------|-------|--------|---------|-------------------------------|
| <i>TubulinGAL4 &gt; p38a<sup>RNAi</sup></i> | <i>TubulinGAL4 &gt; w<sup>1118</sup></i> | PBS   | 2.326  | 0.0445  | Figure 5E                     |
| <i>TubulinGAL4 &gt; p38a<sup>RNAi</sup></i> | <i>TubulinGAL4 &gt; w<sup>1118</sup></i> | IIV-6 | 1.413  | 0.2149  | Figure 5E                     |
| <i>p38b<sup>ex9</sup></i>                   | <i>w<sup>1118</sup></i>                  | PBS   | 3.738  | 0.0009  | Supplemental Figure 4, Top    |
| <i>p38b<sup>ex9</sup></i>                   | <i>w<sup>1118</sup></i>                  | IIV-6 | 8.09   | <0.0001 | Supplemental Figure 4, Top    |
| <i>p38b<sup>ex9</sup></i>                   | <i>w<sup>1118</sup></i>                  | PBS   | 3.843  | 0.2068  | Supplemental Figure 4, Bottom |
| <i>p38b<sup>ex9</sup></i>                   | <i>w<sup>1118</sup></i>                  | IIV-6 | 9.573  | <0.0001 | Supplemental Figure 4, Bottom |
| <i>p38a<sup>MPK1</sup></i>                  | <i>w<sup>1118</sup></i>                  | PBS   | 1.337  | 0.6062  | Supplemental Figure 5, Top    |
| <i>p38a<sup>MPK1</sup></i>                  | <i>w<sup>1118</sup></i>                  | IIV-6 | 0.1465 | <0.0001 | Supplemental Figure 5, Top    |
| <i>p38a<sup>MPK1</sup></i>                  | <i>w<sup>1118</sup></i>                  | PBS   | 1.376  | 0.3507  | Supplemental Figure 5, Bottom |
| <i>p38a<sup>MPK1</sup></i>                  | <i>w<sup>1118</sup></i>                  | IIV-6 | 0.5268 | 0.0104  | Supplemental Figure 5, Bottom |
| <i>TubulinGAL4 &gt; p38b<sup>RNAi</sup></i> | <i>TubulinGAL4 &gt; w<sup>1118</sup></i> | PBS   | 0.5444 | 0.0703  | Supplemental Figure 6, Top    |
| <i>TubulinGAL4 &gt; p38b<sup>RNAi</sup></i> | <i>TubulinGAL4 &gt; w<sup>1118</sup></i> | IIV-6 | 3.723  | <0.0001 | Supplemental Figure 6, Top    |
| <i>TubulinGAL4 &gt; p38b<sup>RNAi</sup></i> | <i>TubulinGAL4 &gt; w<sup>1118</sup></i> | PBS   | 1.268  | 0.6345  | Supplemental Figure 6, Bottom |
| <i>TubulinGAL4 &gt; p38b<sup>RNAi</sup></i> | <i>TubulinGAL4 &gt; w<sup>1118</sup></i> | IIV-6 | 2.77   | <0.0001 | Supplemental Figure 6, Bottom |
| <i>TubulinGAL4 &gt; p38a<sup>RNAi</sup></i> | <i>TubulinGAL4 &gt; w<sup>1118</sup></i> | PBS   | 0.4507 | 0.0044  | Supplemental Figure 7, Top    |
| <i>TubulinGAL4 &gt; p38a<sup>RNAi</sup></i> | <i>TubulinGAL4 &gt; w<sup>1118</sup></i> | IIV-6 | 0.7262 | 0.2994  | Supplemental Figure 7, Top    |
| <i>TubulinGAL4 &gt; p38a<sup>RNAi</sup></i> | <i>TubulinGAL4 &gt; w<sup>1118</sup></i> | PBS   | 2.194  | 0.0866  | Supplemental Figure 7, Bottom |
| <i>TubulinGAL4 &gt; p38a<sup>RNAi</sup></i> | <i>TubulinGAL4 &gt; w<sup>1118</sup></i> | IIV-6 | 0.6175 | 0.1433  | Supplemental Figure 7, Bottom |
