# Supplementary material for: p38b and JAK-STAT signaling protect against Invertebrate iridescent virus 6 infection in Drosophila
Source: PubMed Central journal article supplement (PMC5963806; doi:10.1371/journal.ppat.1007020), 2018-05-10

S2 Fig.

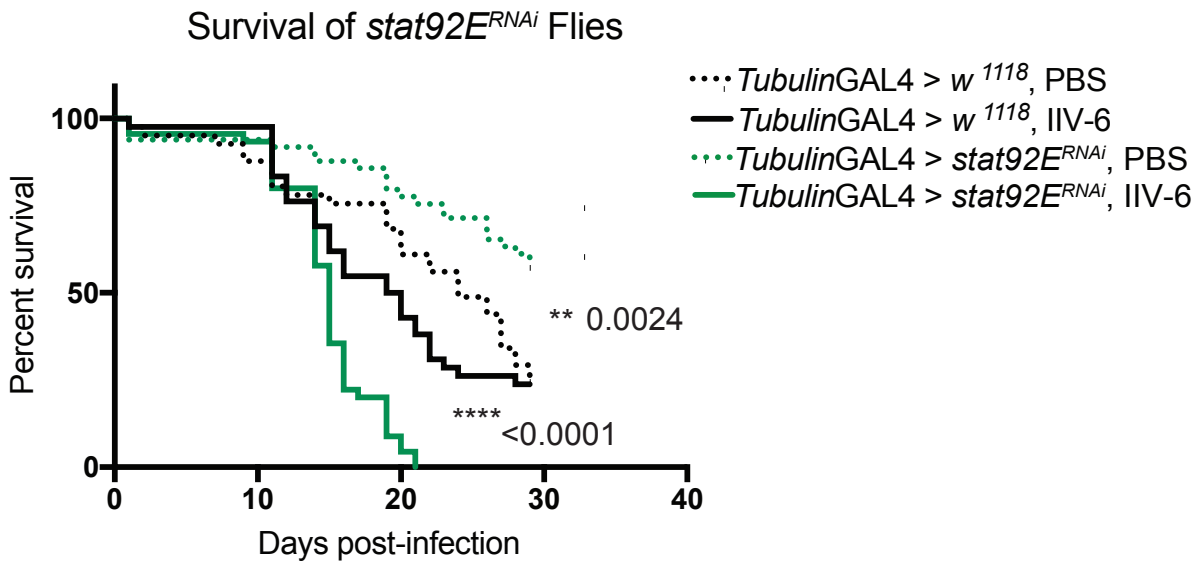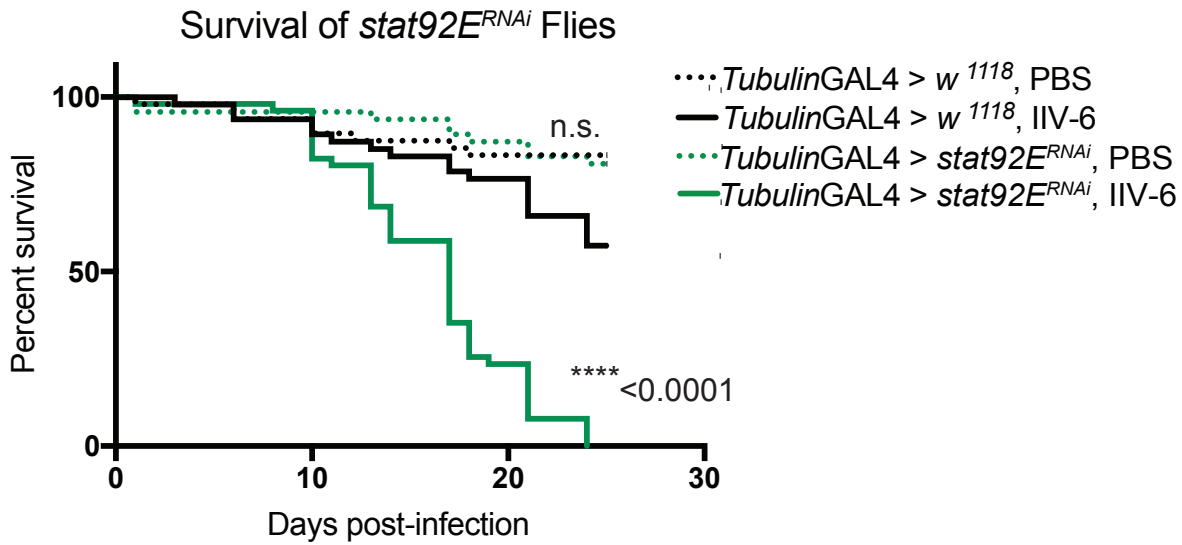

Supplement: ppat.1007020.s004.pdf [file ppat.1007020.s004.pdf]
